# Supplementary material for: Pathogen-specific innate immune response patterns are distinctly affected by genetic diversity
Source: PubMed Central journal article supplement (PMC10241821; doi:10.1038/s41467-023-38994-5), 2023-06-05
Supplement: 41467_2023_38994_MOESM3_ESM.pdf [file 41467_2023_38994_MOESM3_ESM.pdf]

## **Description of Additional Supplementary Files**

**Supplementary Data 1:** List of all source DEGs and full list of enriched KEGG pathways (Excel spreadsheet).

**Supplementary Data 2:** List of all eQTLs (Excel spreadsheet).

**Supplementary Data 3:** List of all reQTLs (Excel spreadsheet).

**Supplementary Data 4:** Shared eGenes across pathogens at 3h and 6h with identical or different cis reQTLs (Excel spreadsheet).

**Supplementary Data 5:** List of all unique reQTLs (Excel spreadsheet).

**Supplementary Data 6:** List of disease-associated GWAS SNPs with reQTL effects in stimulated monocytes with all associations of reQTLs and GWAS diseases and disease abbreviations (Excel spreadsheet).

**Supplementary Data 7:** Results of colocalization analysis with coloc (Excel spreadsheet).

**Supplementary Data 8:** List of DEGs that are identified by four statistical tools to identify differential gene expression (Excel spreadsheet).
